# Supplementary material for: CXCL13 as a biomarker in the diagnostics of European lyme Neuroborreliosis - A prospective multicentre study in Austria
Source: PubMed Central journal article supplement — J Cent Nerv Syst Dis. 2024 May 2;16:11795735241247026. doi: 10.1177/11795735241247026 (PMC11067428; doi:10.1177/11795735241247026), 2024-05-02
Supplement: sj-pdf-1-cns-10.1177_11795735241247026.pdf [file sj-pdf-1-cns-10.1177_11795735241247026.pdf]

**Table 6: Supplements – Subcohorts of controls and their CSF test results**

|                                                         | Intrathecal CXCL13 (pg/ml)  | CSF cell count (threshold <5/μl)   | Borrelia antibody index (threshold <1.6) | CSF-protein (threshold <46mg/dl) |
|---------------------------------------------------------|-----------------------------|------------------------------------|------------------------------------------|----------------------------------|
|                                                         | Mean (SD), min, max         | Mean (SD), min, max                | Mean (SD), min, max                      | Mean (SD), min, max              |
| <b>Meningitis/Encephalitis</b>                          |                             |                                    |                                          |                                  |
| Viral meningitis (n=18)                                 | 71 (124), min: 0, max: 530  | 243 (206), min: 11, max: 609       | 0.1 (0.2), min: 0, max: 0.9              | 76 (38), min: 33, max: 182       |
| Bacterial meningitis (n=3)                              | 17 (15), min: 0, max: 27    | 10939 (18124), min: 14, max: 31861 | 0.5 (0.7), min: 0, max: 0.9              | 247 (307), min: 47, max: 600     |
| Autoimmune meningitis (n=3)                             | 260 (427), min: 0, max: 753 | 16 (22), min: 3, max: 41           | 0.4 (0.6), min: 0, max: 0.8              | 40 (29), min: 19, max: 73        |
| Neurosarcoidosis (n=1)                                  | 1272                        | 167                                | 0                                        | 133                              |
| Chronic meningitis (n=1)                                | 49                          | 23                                 | 0                                        | 66                               |
| <b>Peripheral nerve disorders, other than AIDP/CIDP</b> |                             |                                    |                                          |                                  |
| Motor neuron diseases (n=5)                             | 4 (5), min: 0, max: 10      | 2 (1), min: 1, max: 3              | 0.2 (0.4), min: 0, max: 1                | 43 (14), min: 30, max: 60        |
| Neuralgic amyotrophy (n=3)                              | 0 (0), min: 0, max: 0       | 4 (4), min: 1, max: 8              | 0 (0), min: 0, max: 0                    | 35 (2), min: 33, max: 37         |
| Plexus neuritis, other than neuralgic amyotrophy (n=3)  | 136 (228), min: 0, max: 400 | 38 (64), min: 0, max: 111          | 0 (0), min: 0, max: 0                    | 86 (47), min: 53, max: 140       |
| Radiculitis (n=3)                                       | 56 (56), min: 0, max: 111   | 75 (82), min: 2, max: 163          | 0 (0), min: 0, max: 0                    | 51 (17), min: 38, max: 70        |
| Non-inflammatory radiculopathy (n=3)                    | 60 (103), min: 0, max: 179  | 3 (2), min: 1, max: 4              | 0.5 (0.7), min: 0, max: 1                | 76 (56), min: 37, max: 140       |
| Non-inflammatory mononeuropathy (n=6)                   | 2 (4), min: 0, max: 10      | 4 (4), min: 1, max: 11             | 0 (0), min: 0, max: 0                    | 52 (18), min: 25, max: 74        |
| Non-inflammatory polyneuropathy (n=4)                   | 3 (4), min: 0, max: 9       | 3 (2), min: 1, max: 6              | 0 (0), min: 0, max: 0                    | 54 (24), min: 28, max: 86        |
| <b>Other cranial nerve disorders</b>                    |                             |                                    |                                          |                                  |
| Infectious diseases (n=6)                               | 24 (28), min: 0, max: 65    | 50 (86), min: 1, max: 222          | 0.6 (0.9), min: 0, max: 2                | 54 (16), min: 41, max: 80        |
| Diabetogenic (n=1)                                      | 0                           | 1                                  | n.d.                                     | 57                               |
| Traumatic (n=1)                                         | 0                           | 6                                  | 0                                        | 63                               |
| Trigeminal neuralgia (n=1)                              | 0                           | 2                                  | 0.8                                      | 73                               |
| Idiopathic (n=14)                                       | 28 (106), min: 0, max: 396  | 4 (4), min: 1, max: 12             | 0.2 (0.5), min: 0, max: 1.2              | 55 (25), min: 15, max: 101       |
| <b>Headache, other than meningitis</b>                  |                             |                                    |                                          |                                  |
| Migraine (n=15)                                         | 2 (3), min: 0, max: 9       | 2 (2), min: 0, max: 6              | 0 (0), min: 0, max: 0                    | 40 (12), min: 17, max: 63        |
| Tension type headache (n=11)                            | 2 (4), min: 0, max: 13      | 3 (2), min: 1, max: 6              | 0 (0), min: 0, max: 0                    | 47 (26), min: 22, max: 122       |
| Acute infection, accompanied by headache (n=13)         | 1 (5), min: 0, max: 17      | 4 (6), min: 1, max: 19             | 0 (0), min: 0, max: 0                    | 39 (20), min: 16, max: 91        |
| Normal pressure hydrocephalus (n=7)                     | 3 (3), min: 0, max: 8       | 1.1 (0.4), min: 1, max: 2          | 0 (0), min: 0, max: 0                    | 59 (26), min: 32, max: 111       |
| Idiopathic intracranial headache (n=5)                  | 1 (2), min: 0, max: 5       | 3 (2), min: 1, max: 5              | 0 (0), min: 0, max: 0                    | 33 (16), min: 12, max: 50        |
| Vasculitic headache (n=1)                               | 5                           | 2                                  | n.d.                                     | 22                               |
| Other headaches (n=9)                                   | 7 (13), min: 0, max: 40     | 12 (26), min: 1, max: 81           | 0 (0), min: 0, max: 0                    | 46 (12), min: 30, max: 67        |
| <b>Other, including epilepsy</b>                        |                             |                                    |                                          |                                  |
| Movement disorders (n=7)                                | 2 (4), min: 0, max: 11      | 4 (5), min: 0, max: 14             | 0.2 (0.5), min: 0, max: 1.2              | 57 (55), min: 20, max: 178       |
| Psychiatric disorders (n=7)                             | 0.1 (0.4), min: 0, max: 1   | 8 (14), min: 1, max: 40            | 0.3 (0.6), min: 0, max: 1.2              | 43 (18), min: 21, max: 72        |
| Transverse myelitis (n=6)                               | 30 (46), min: 0, max: 111   | 7 (7), min: 1, max: 18             | 0.3 (0.4), min: 0, max: 0.9              | 40 (7), min: 30, max: 46         |
| Epilepsy (n=5)                                          | 1 (2), min: 0, max: 5       | 5 (5), min: 0, max: 12             | 0 (0), min: 0, max: 0                    | 43 (20), min: 23, max: 66        |
| Brain tumour (n=3)                                      | 3 (6), min: 0, max: 10      | 6 (7), min: 1, max: 14             | 0 (0), min: 0, max: 0                    | 37 (6), min: 33, max: 44         |
| Myasthenia gravis (n=2)                                 | 0 (0), min: 0, max: 0       | 1 (0), min: 1, max: 1              | 0 (0), min: 0, max: 0                    | 33 (4), min: 30, max: 36         |
| Polymyositis (n=1)                                      | 0                           | 0                                  | 0                                        | 32                               |
| PRES (n=1)                                              | 0                           | 1                                  | n.d.                                     | 156                              |
| Progressive multifocal leukoencephalopathy (PML) (n=1)  | 27                          | 1                                  | 0                                        | 34                               |
| Steroid responsive encephalopathy (SREAT) (n=1)         | 5                           | 10                                 | n.d.                                     | 65                               |
| Brain lesions of unclear aetiology (n=14)               | 3 (4), min: 0, max: 10      | 4 (3), min: 0, max: 9              | 0 (0), min: 0, max: 0                    | 37 (19), min: 18, max: 75        |
| Other (n=37)                                            | 5 (19), min: 0, max: 112    | 2 (1), min: 0, max: 5              | 4 (20), min: 0, max: 107                 | 40 (20), min: 15, max: 124       |

Table 1 Supplements: Subcohorts of controls and their CSF test results
